# Supplementary material for: State-Level Policy Environments, Discrimination, and Victimization among Sexual and Gender Minority People
Source: MDPI journal article supplement (doi:10.3390/ijerph19169916), 2022-08-11
Supplement: s1 [file s1]

**Supplementary Table S1.** Results of logistic regression models examining the relationship between state-level policy environment scores and past-year discrimination and victimization within The PRIDE Study ( $N = 7044$ ) with a random effect for state.

| Dependent Variable predicted by<br>state-level policy scores ( <i>OR, p, CI</i> ) | Cisgender, Sexual<br>Minority<br>( <i>n</i> = 4514)                 | Binary Gender<br>Minority<br>( <i>n</i> = 877) | Gender Expansive<br>( <i>n</i> = 1653)                             |
|-----------------------------------------------------------------------------------|---------------------------------------------------------------------|------------------------------------------------|--------------------------------------------------------------------|
| <b>Discrimination Experiences</b>                                                 | <b>OR = 1.010, <i>p</i> = 0.040</b><br><b>95% CI (1. 000–1.029)</b> | Not Converged                                  | <b>OR = 1.010, <i>p</i> = 0.042</b><br><b>95% CI (1.000–1.020)</b> |
| <b>Victimization Experiences</b>                                                  | Not Converged                                                       | Not Converged                                  | Not Converged                                                      |

All models covaried for age, race, ethnicity, sexual orientation, education level, and household income.

Abbreviations: Odds ratio (OR), Confidence Interval (CI)

Bolded results are statistically significant ( $p < 0.05$ ).

**Supplementary Table S2.** Results of logistic regression analyses for changes in state-level policy scores (2017–2019) and their association with past year discrimination and victimization among an online national cohort of sexual and/or gender minority people ( $N = 7044$ ) with a random effect for state.

| Dependent Variable predicted by<br>state-level policy scores ( <i>OR</i> , <i>p</i> ,<br><i>CI</i> ) | Cisgender, Sexual<br>Minority<br>( <i>n</i> = 4570)  | Binary Gender<br>Minority<br>( <i>n</i> = 889)      | Gender Expansive<br>( <i>n</i> = 1685)                  |
|------------------------------------------------------------------------------------------------------|------------------------------------------------------|-----------------------------------------------------|---------------------------------------------------------|
| <b>Discrimination Experiences</b>                                                                    | OR = 0.995, <i>p</i> = 0.824<br>95% CI (0.953–1.039) | OR = 1.004 <i>p</i> = 0.924<br>95% CI (0.919–1.080) | OR = 1.006, <i>p</i> = 0.816<br>95% CI (0.956–1.058877) |
| <b>Victimization Experiences</b>                                                                     | Not Converged                                        | Not Converged                                       | OR = 0.958, <i>p</i> = .806<br>95% CI (0.680–1.350)     |

All models covaried for age, race, ethnicity, sexual orientation, education level, and household income.

Abbreviations: Odds ratio (OR), Confidence Interval (CI)

Bolded results are statistically significant ( $p < 0.05$ ).
